# Supplementary material
Source: Springer Nature journal article supplement (https://www.springermedizin.de/resource/supplementary/12903_2013_355_MOESM5_ESM.docx/9516850)
Supplement: MOESM5 [file 9516850]

**Table 5 Periodontal status according to gender (N=873)**

|  | All | Boys | Girls | P value |
| --- | --- | --- | --- | --- |
| No. (%) of children |  |  |  |  |
| Highest CPI = 0 | 257 (29%) | 111 (25%) | 146 (34%) | 0.007 |
| Highest CPI = 1 | 111 (13%) | 48 (11%) | 63 (15%) | 0.112 |
| Highest CPI = 2 | 505 (58%) | 280 (64%) | 225 (52%) | <0.001 |
| Mean (SD) number of sextants: |  |  |  |  |
| Healthy (CPI = 0) | 4.6 (1.3) | 4.4 (1.3) | 4.7 (1.2) | <0.001 |
| Bleeding only (CPI = 1) | 0.3 (0.6) | 0.4 (0.7) | 0.3 (0.6) | 0.318 |
| With calculus (CPI = 2) | 1.1 (1.2) | 1.2 (1.2) | 1.0 (1.1) | 0.001 |
